# Supplementary material for: Physicochemical and Sensory Assessments in Spain and United States of PGI-Certified Ternera de Navarra vs. Certified Angus Beef
Source: MDPI journal article supplement (doi:10.3390/foods10071474), 2021-06-25
Supplement: s1 [file s1]

**Table S1. Comparison of minimum specifications between  
USDA Certified Angus Beef and PGI-Certified *Ternera de Navarra*.**

| <b>Program/Brand name</b>                 | <b><i>Certified Angus Beef</i></b> | <b>PGI Certified <i>Ternera de Navarra</i></b>                                                              |
|-------------------------------------------|------------------------------------|-------------------------------------------------------------------------------------------------------------|
| <i>Specification number</i>               | G-1                                | N/A                                                                                                         |
| <i>Live Animal Requirement</i>            |                                    |                                                                                                             |
| <i>Phenotype</i>                          | AAA                                | N/A                                                                                                         |
| <i>Genotype</i>                           | AAA                                | Pyreanean ( <i>Pirenaica</i> ); Blonde d' Aquitaine, Alpine Brown, Charolaise and crossbreds                |
| <i>Other</i>                              | N/A                                | Autochthonous of the Navarra region. Mandatory suckling up to 4 mo. of age and regulated feeding practices. |
| <i>Carcass characteristics</i>            |                                    |                                                                                                             |
| <i>US Prime</i>                           | x                                  | N/A                                                                                                         |
| <i>US Choice</i>                          | x                                  | N/A                                                                                                         |
| <i>Maturity</i>                           | <30 mo. of age                     | Male calves: 9 to 13 mo. of age<br>Female calves: 8 to 12 mo. Of age                                        |
| <i>Marbling Score Requirement</i>         | Modest <sup>00</sup> or higher     | N/A                                                                                                         |
| <i>Medium or fine marbling texture</i>    | x                                  | N/A                                                                                                         |
| <i>Ribeye area (cm<sup>2</sup>)</i>       | 64.5-103.2/122.6**                 | N/A                                                                                                         |
| <i>Hot carcass weight (kg)</i>            | 476.27*                            | N/A                                                                                                         |
| <i>Fat thickness (cm)</i>                 | <1.0                               | N/A                                                                                                         |
| <i>Fat cover class</i>                    |                                    | Between 2 and 3***                                                                                          |
| <i>Minimum muscling requirement</i>       | x                                  | S-E-U-R***                                                                                                  |
| <i>Carcass Class (type)</i>               | Steers & Heifers                   | Veal ( <i>Ternera</i> ) Eligible for entire male and female calves.                                         |
| <i>Capillary rupture in ribeye muscle</i> | PF                                 | N/A                                                                                                         |
| <i>Free of dark cutting traits</i>        | x                                  | N/A                                                                                                         |
| <i>Max. Hump height &lt;5.08 cm</i>       | x                                  | N/A                                                                                                         |

x=Program requirement. \* See specification for specific program requirement.

\*\* G-1 Specification:

Option 1 (default) is 64.5-103.2 cm<sup>2</sup> REA

Option 2 is 64.5-122.6 cm<sup>2</sup> REA.

AAA=USDA Specification for characteristics of cattle eligible for Approved Beef Programs claiming Angus influence. Currently, for phenotypic requirements, cattle must be predominantly (51 percent) black, along with other exclusionary criteria.

PF=practically free of capillary ruptures.

\*\*\* Fat cover and conformation scores according to the EU classification norm.

N/A=Not applicable.

Source: USDA Certified Beef Programs

<https://www.ams.usda.gov/sites/default/files/media/LPSCertifiedBeefProgramComparison.pdf>;

Pliego de condiciones de la IGP "Ternera de Navarra-Nafarroako Aratxea"

[http://www.navarra.es/NR/rdonlyres/48025029-AFE9-4F8F-8557-](http://www.navarra.es/NR/rdonlyres/48025029-AFE9-4F8F-8557-CA727D484637/304236/PCIGPTerneradeNavarra2004.pdf)

[CA727D484637/304236/PCIGPTerneradeNavarra2004.pdf](http://www.navarra.es/NR/rdonlyres/48025029-AFE9-4F8F-8557-CA727D484637/304236/PCIGPTerneradeNavarra2004.pdf)
